# Supplementary material
Source: publisher site journal article supplement (https://www.dovepress.com/article/478989)
Supplement: Supplementary file 1 [file get_supplementary_file.php]

## **Supplementary**


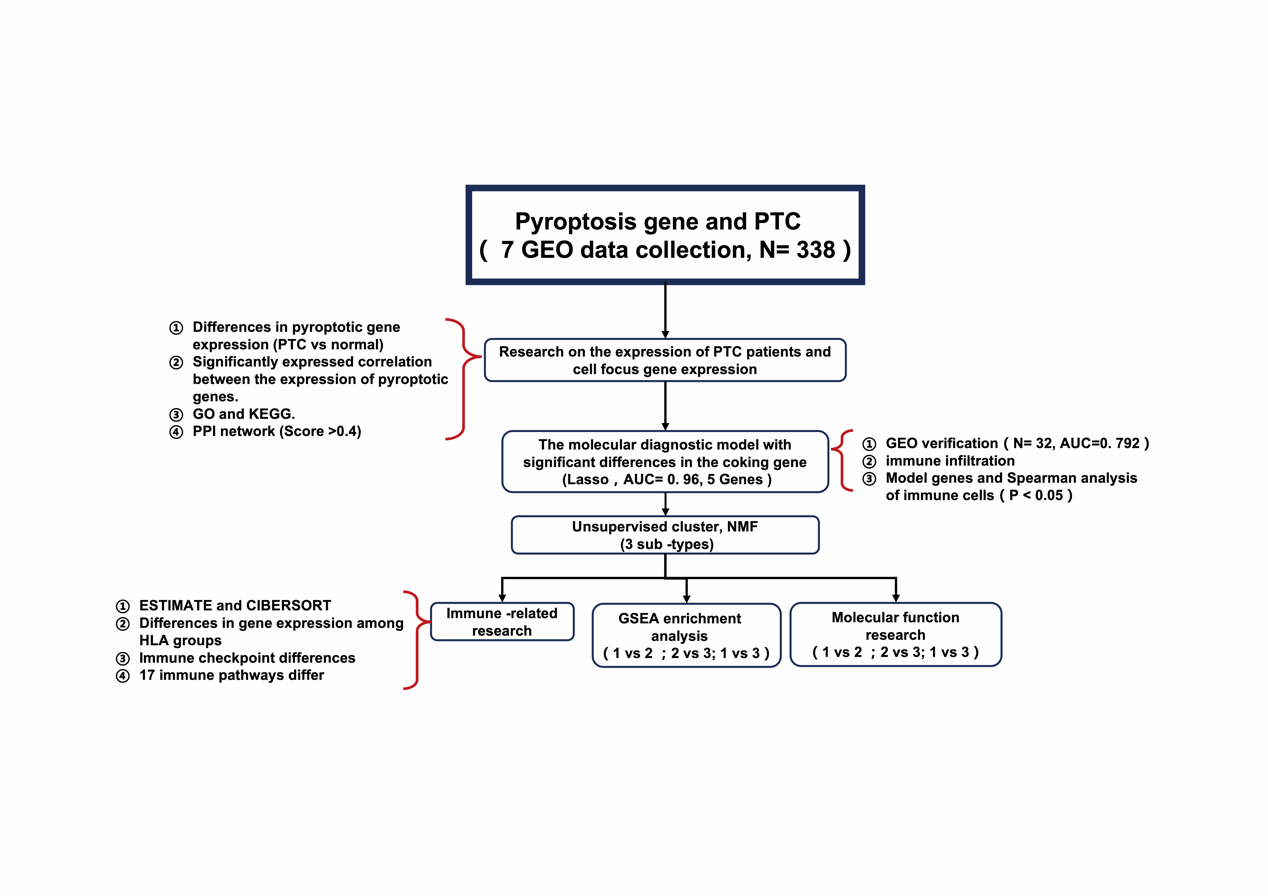


Supplement Fig 1. Flowchart of research design and analyzing process of this study.


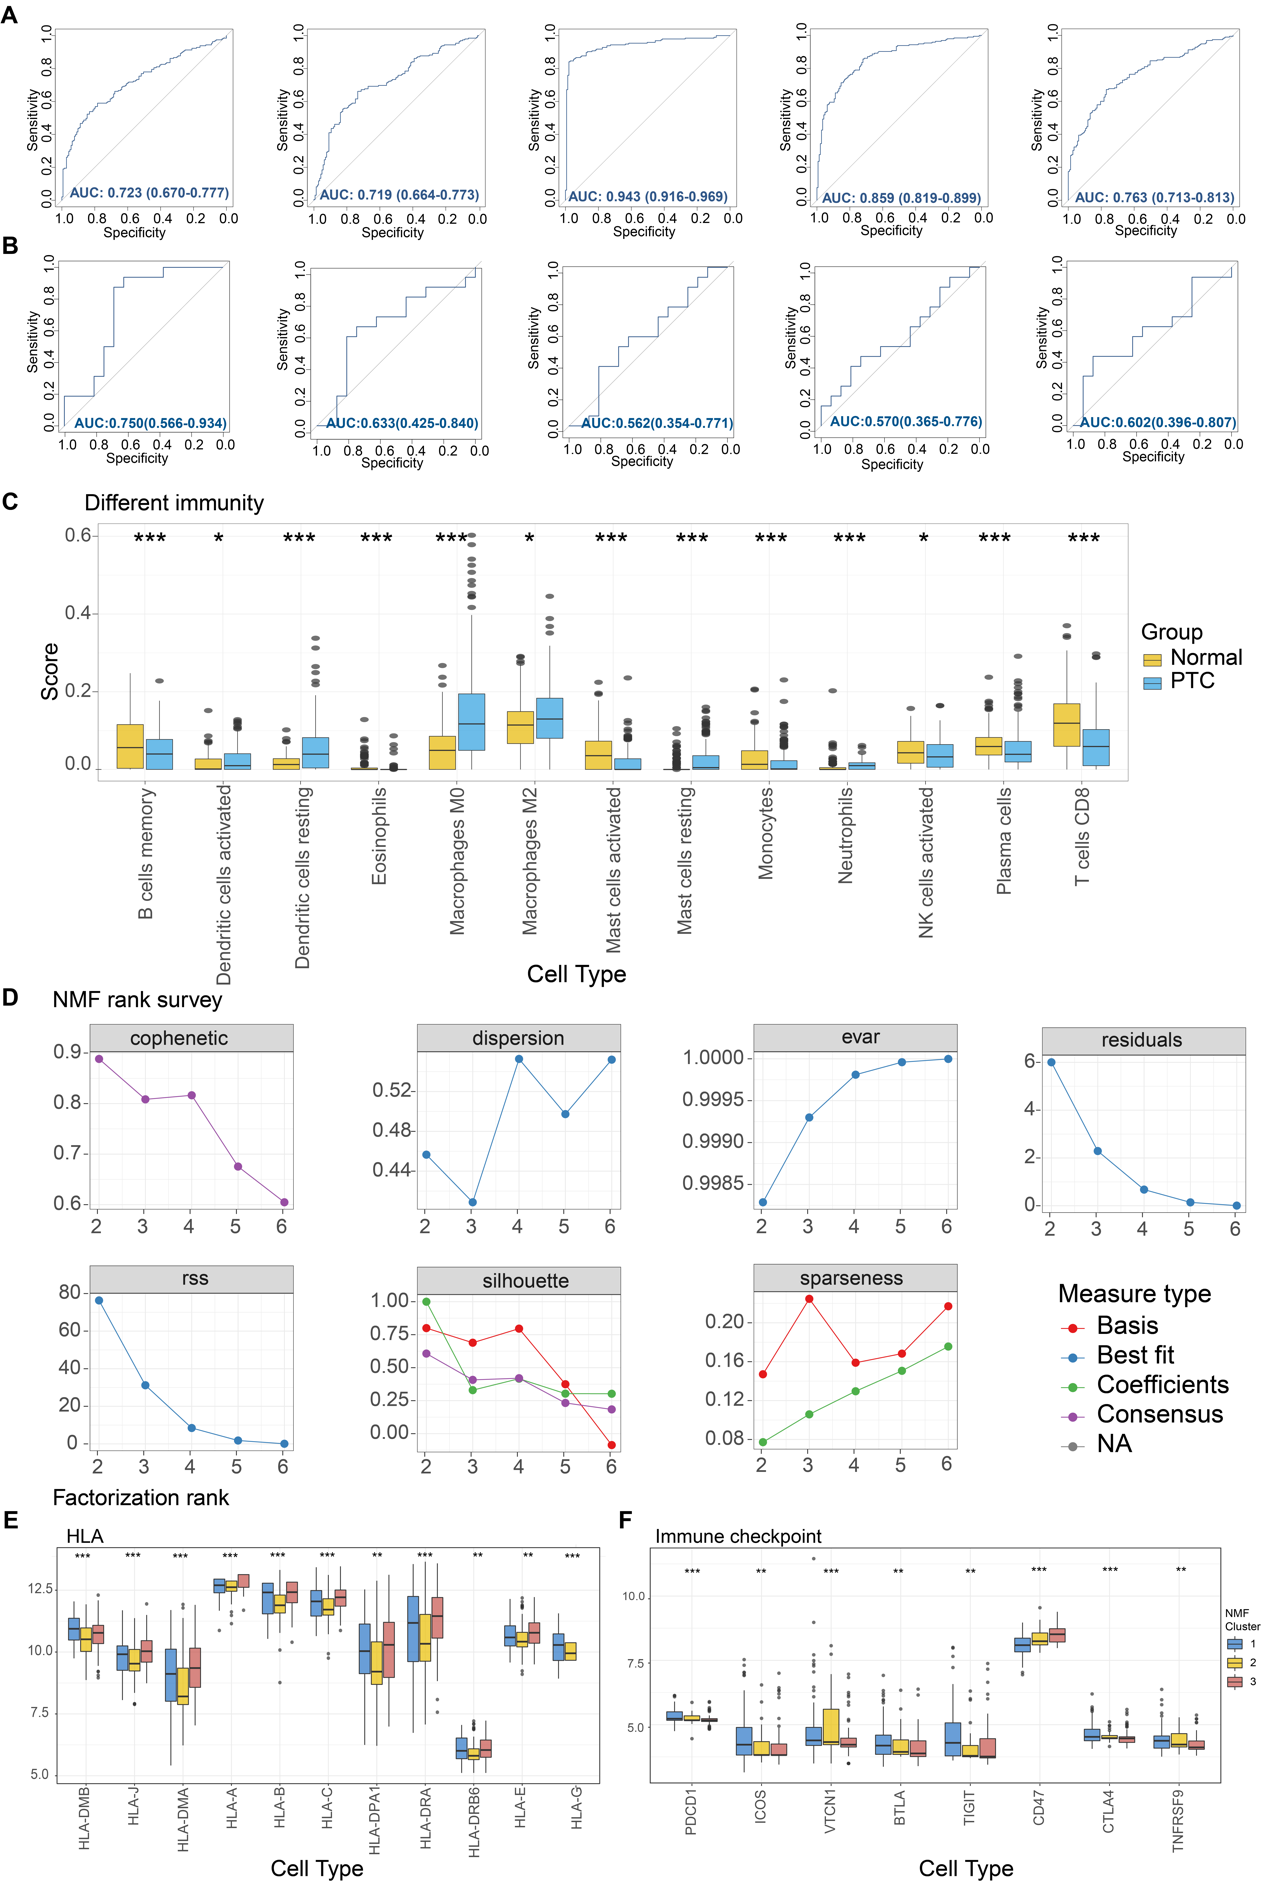


Supplement Fig 2. Gene set enrichment analysis studies and Differences A. GO and KEGG enrichment results for 16 pyroptosis genes (Top 5). B. PPI network for 16 genes (Score > 0.4). C. Significantly different immune infiltrating cells in PTC vs. healthy group. D. Confirmation of the optimal number of NMF clusters. E. Distribution of differences in human leukocyte antigen (HLA)-related gene sets among the three subgroups. F. Differences in immune checkpoints among the three subtypes. *p < 0.05, **p < 0.01, ***p < 0.001.


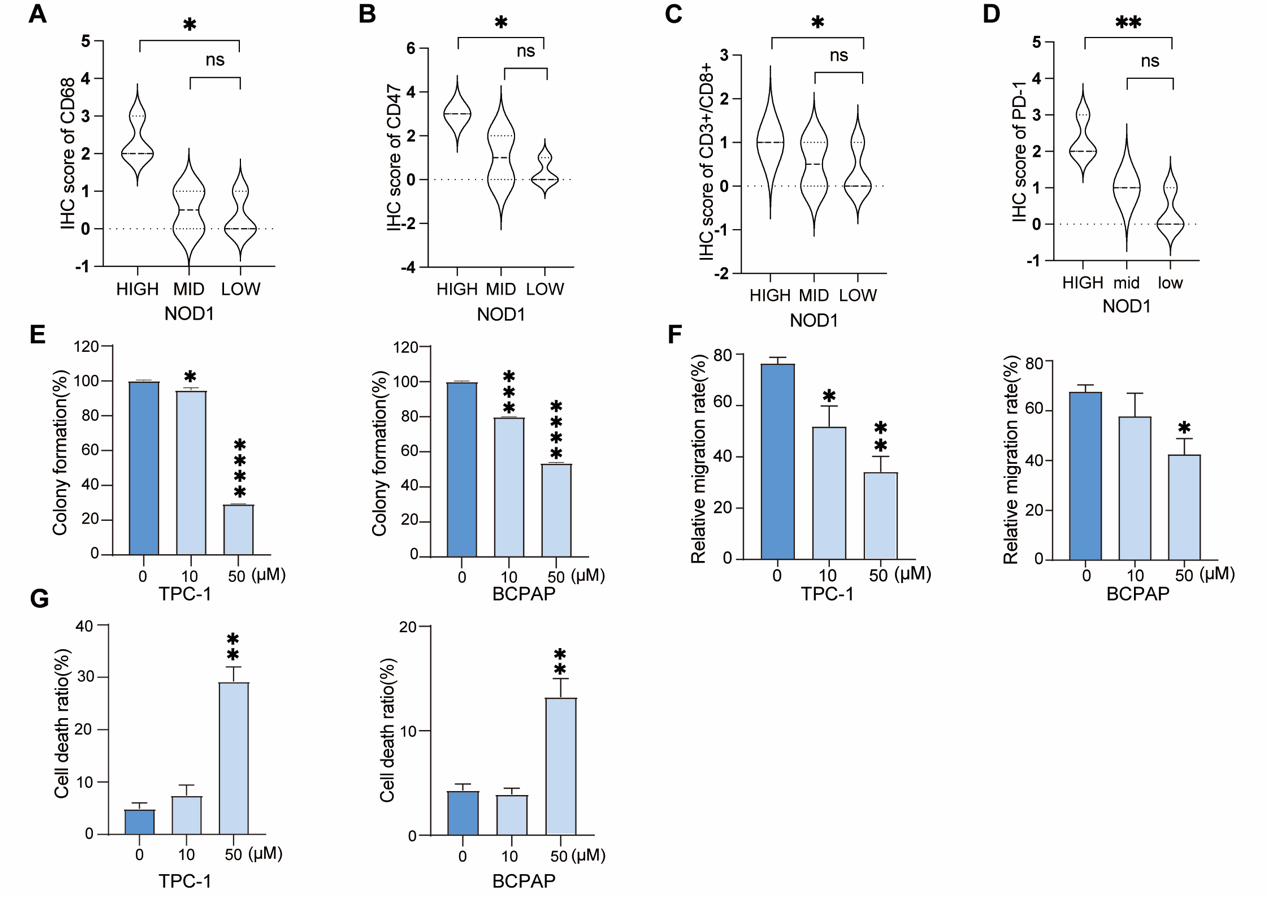


Supplement Fig 3. Clinical specimen validation and in vitro experimental quantification diagram. A, B, C, D. Kaplan–Meier analysis of the significance of CD68, CD47, CD3 and CD8 simultaneous expression and PD-1level in the prognosis of patients with PTC at our center. E. Qualitative analyze of TPC-1 and BCPAP cell clone formation at the indicated concentrations of ML130. F. Qualitative analyze of TPC-1 and BCPAP cell migration ability at the indicated concentrations of ML130. G. The cell death ratio of flow assay to detect the effect of ML130 on TPC-1 and BCPAP. Data are shown as mean ± SD for n = 3. *p < 0.05, **p < 0.01, ***p < 0.001, *****p* < 0.0001.
